# Supplementary material for: Assessing approaches to determine the effect of ocean acidification on bacterial processes
Source: Copernicus journal article supplement (doi:10.5194/bg-2016-63), 2016-03-24

## **Supplementary Material**

Supplementary figure legends

Supplementary figures S1-S6

## **Supplementary figure legends**

### **Table S1**

Average LAP activity buffered in 0.1 M Tris and MOPS at pH 8.1 in coastal seawater ( $n=3 \pm SE$ ).

### **Figure S2**

Change in pH<sub>t</sub> in each treatment during trial 1 ( $n=3 \pm SD$ ).

### **Figure S3**

Change in pH<sub>t</sub> in each treatment during trial 2 ( $n=3 \pm SD$ ).

### **Figure S4**

Cell specific AG activity (mean  $\pm$  SE,  $n=3$ ) in response to seawater acidified with 0.1 M HCl (A), bubbled with CO<sub>2</sub>-Air gas mixture (B) and CO<sub>2</sub>-Air gas mixture introduced through gas-permeable silicon tubing (P) in trial 1.

### **Figure S5**

Cell specific AAP activity (mean  $\pm$  SE,  $n=3$ ) in response to seawater acidified with 0.1 M HCl (A), bubbled with CO<sub>2</sub>-Air gas mixture (B) and CO<sub>2</sub>-Air gas mixture introduced through gas-permeable silicon tubing (P) in trial 1.

### **Figure S6**

Cell specific AAP activity (mean  $\pm$  SE,  $n=3$ ) in response to seawater acidified with 0.1 M HCl (A), bubbled with CO<sub>2</sub>-Air gas mixture (B) and CO<sub>2</sub>-Air gas mixture introduced through gas-permeable silicon tubing (P) in trial 2.

## Supplementary figures

**Table S1**

| Trial | Tris activity (nmol l <sup>-1</sup> h <sup>-1</sup> ) | MOPS activity (nmol l <sup>-1</sup> h <sup>-1</sup> ) |
|-------|-------------------------------------------------------|-------------------------------------------------------|
| 1     | 51.54 (±2.32)                                         | 43.42 (±1.43)                                         |
| 2     | 35.92 (±0.81)                                         | 29.34 (±1.08)                                         |

Figure S2

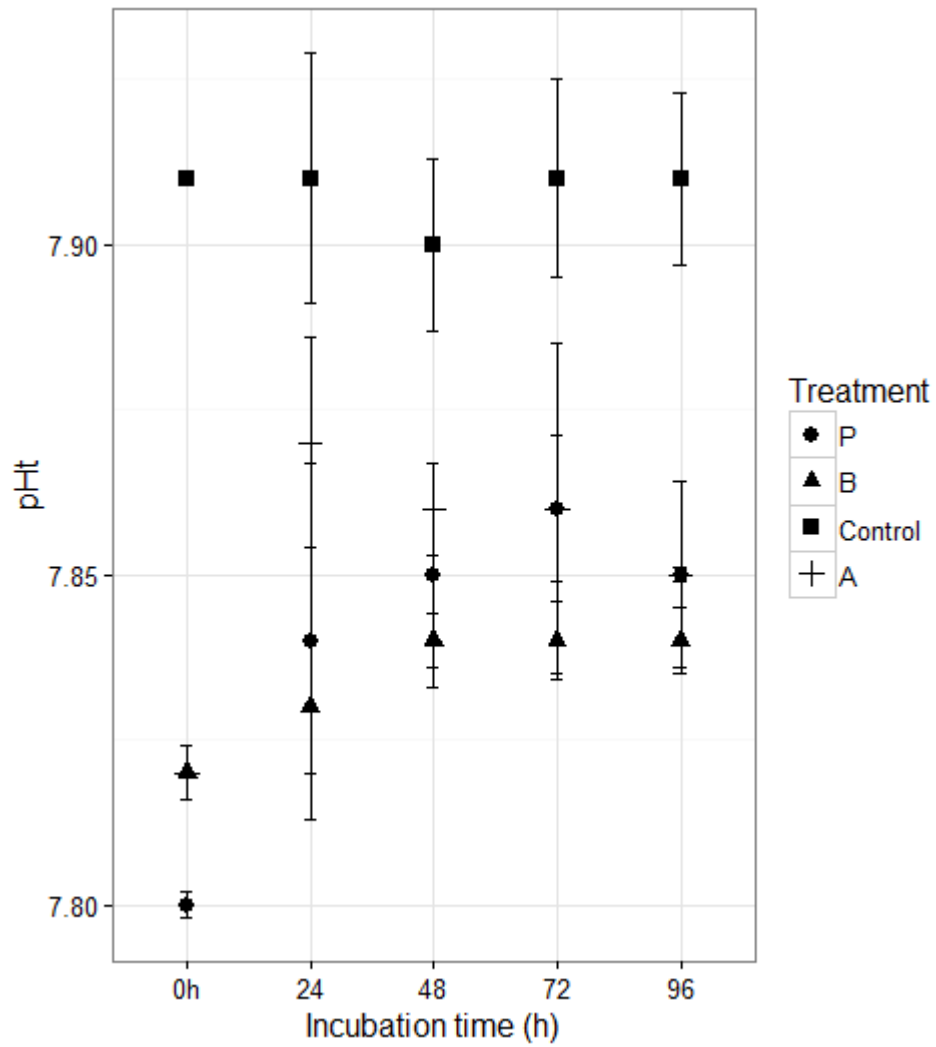

Figure S3

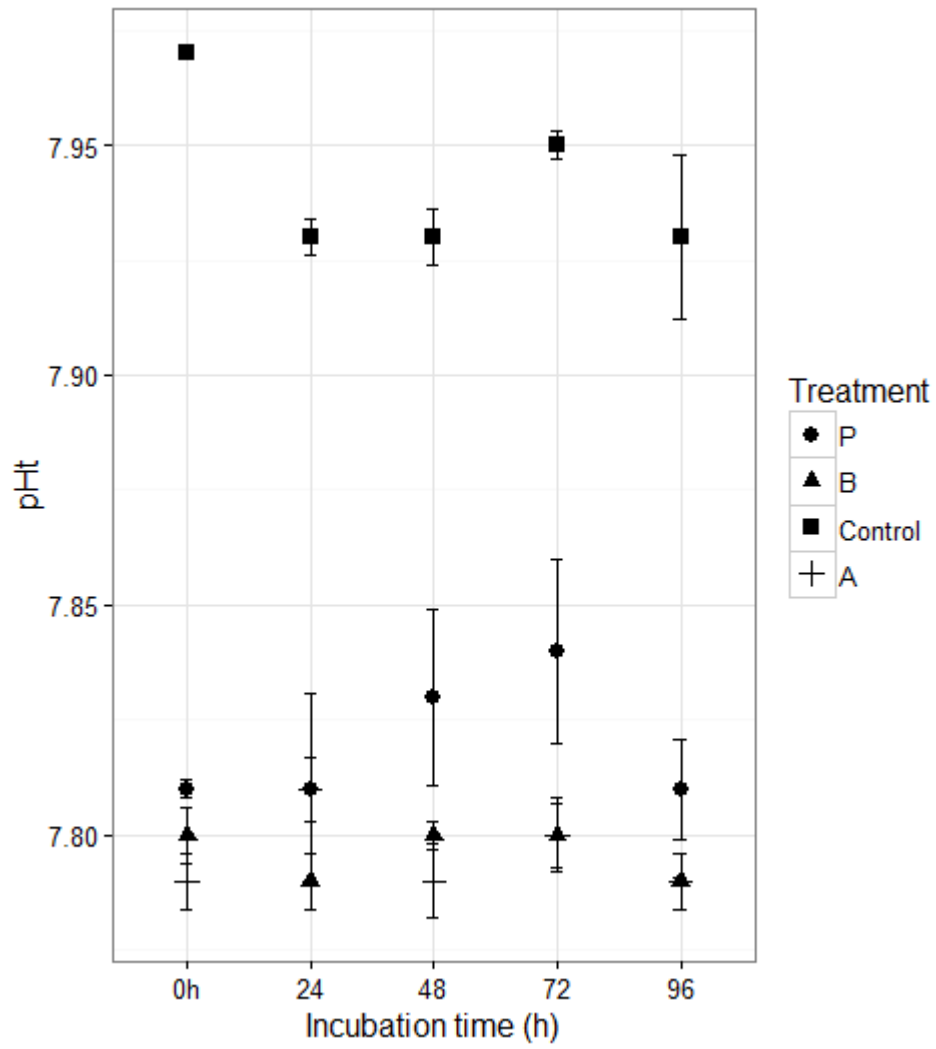

Figure S4

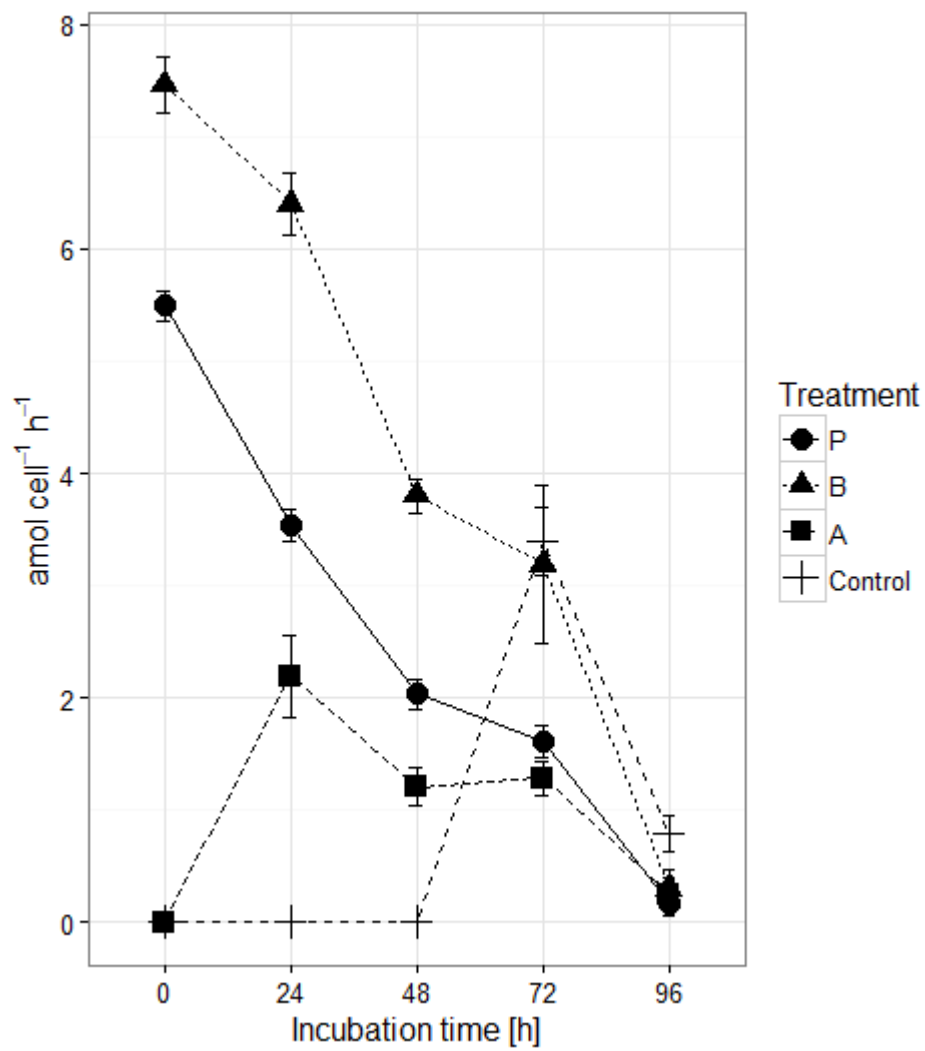

Figure S5

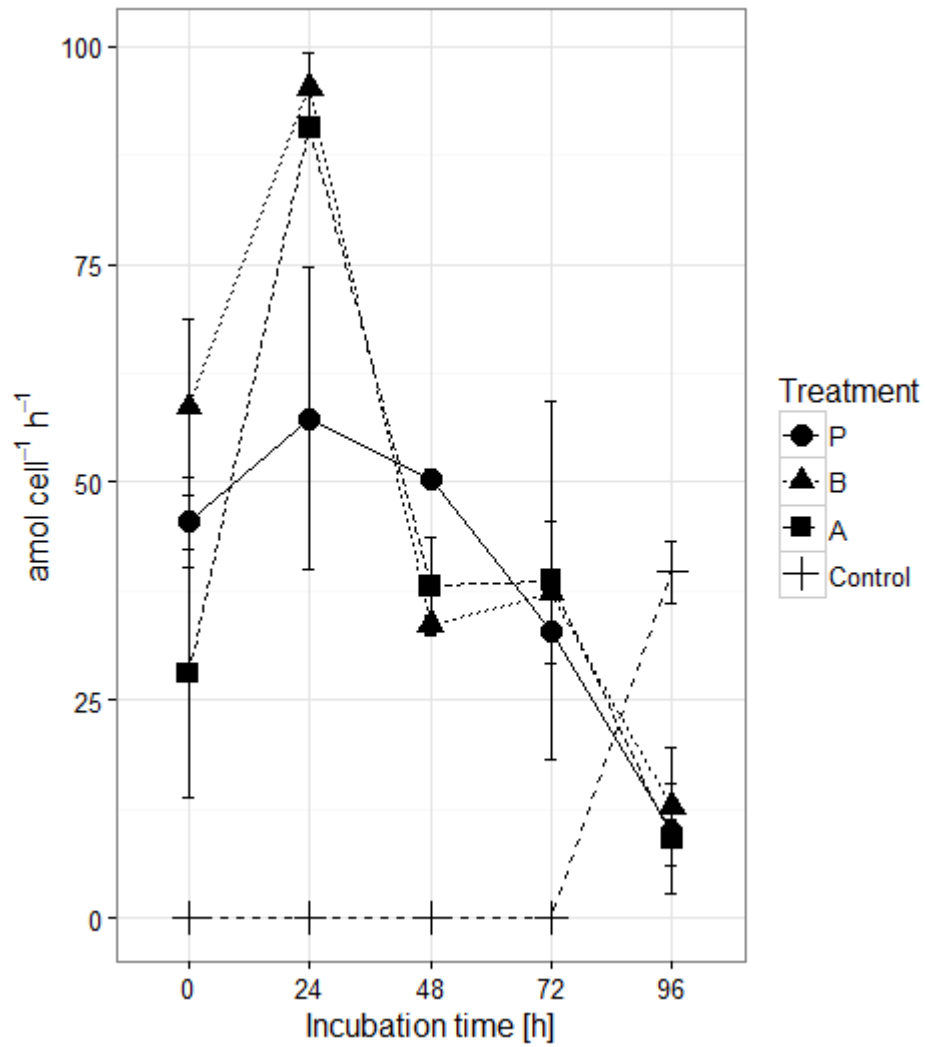

Figure S6

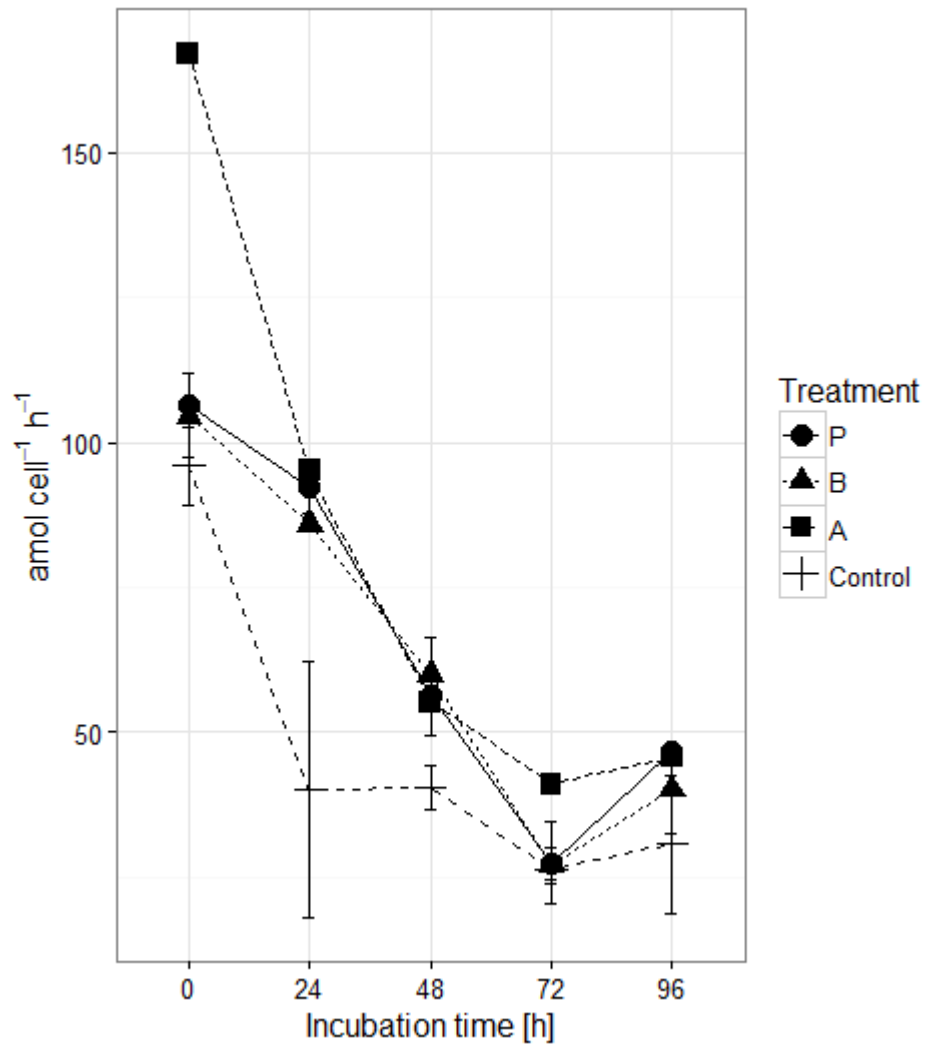

Supplement: Supplementary file [file bg-2016-63-AC2-supplement.pdf]
